# Supplementary material for: Investigation of the mechanical and transport properties of InGeX3 (X = S, Se and Te) monolayers using density functional theory and machine learning
Source: Royal Society of Chemistry journal article supplement (doi:10.1039/d3cp01441j), 2023-01-01
Supplement: d3cp01441j2.pdf [file d3cp01441j2.pdf]

Supplementary information

**Mechanical and transport properties of  $\text{InGeX}_3$  ( $\text{X}=\text{S}$ ,  $\text{Se}$  and  $\text{Te}$ ) monolayer using density functional theory and machine learning**

Yong-Bo Shi,<sup>1</sup> Yuan-Yuan Chen,<sup>1</sup> Hao Wang,<sup>1</sup> Shuo Cao,<sup>2</sup> Heng-Xu Zhu,<sup>3</sup>  
Meng-Fan Chu,<sup>4</sup> Zhu-Feng Shao,<sup>1</sup> Hai-Kuan Dong,<sup>1,\*</sup> and Ping Qian<sup>3,†</sup>

<sup>1</sup>*College of Physical Science and Technology, Bohai University, Jinzhou 121013, PR China*

<sup>2</sup>*Beijing Advanced Innovation Center for Materials Genome Engineering, Corrosion and Protection Center, University of Science and Technology Beijing, Beijing 100083, PR China*

<sup>3</sup>*Department of Physics, University of Science and Technology Beijing, Beijing 100083, PR China*

<sup>4</sup>*College of Miami, Henan University, Kaifeng 475004, PR China*

---

\* [donghaikuan@163.com](mailto:donghaikuan@163.com)

† [qianping@ustb.edu.cn](mailto:qianping@ustb.edu.cn)

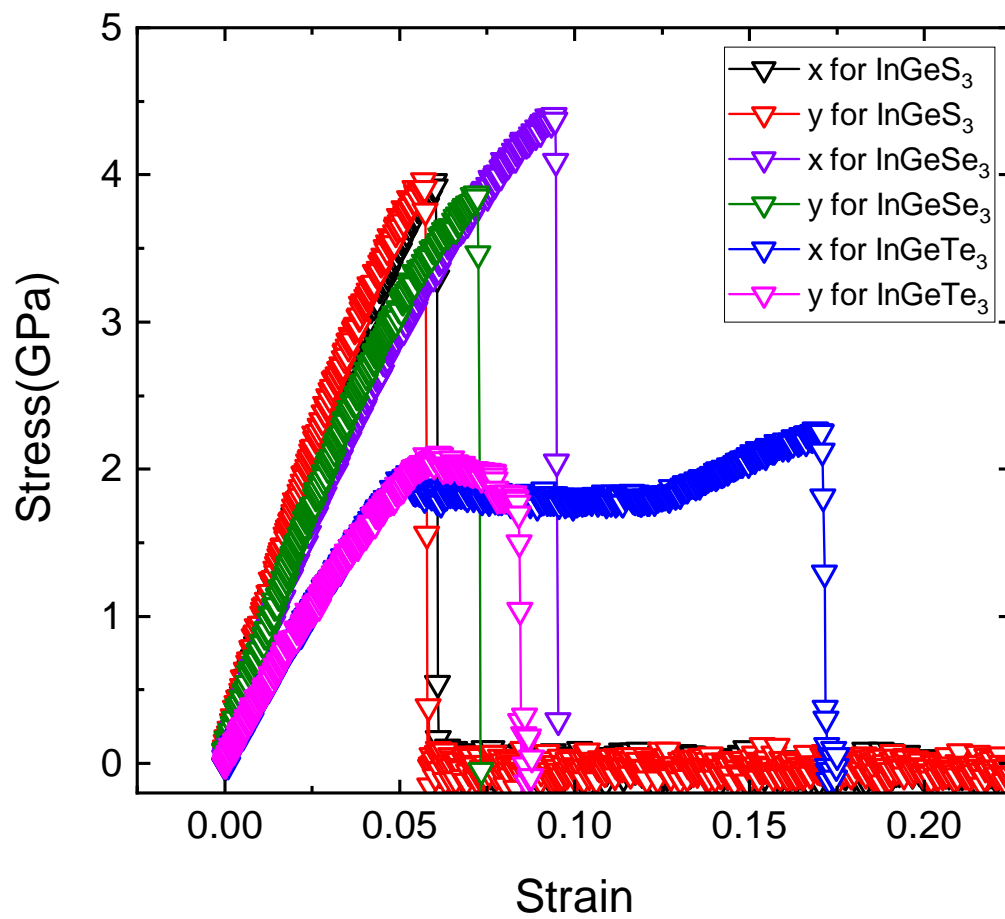

Figure S1. Stress as a function of uniaxial strain for InGeX<sub>3</sub> (X=S, Se and Te) monolayer calculated by NEP-based MD simulations at 300 K.

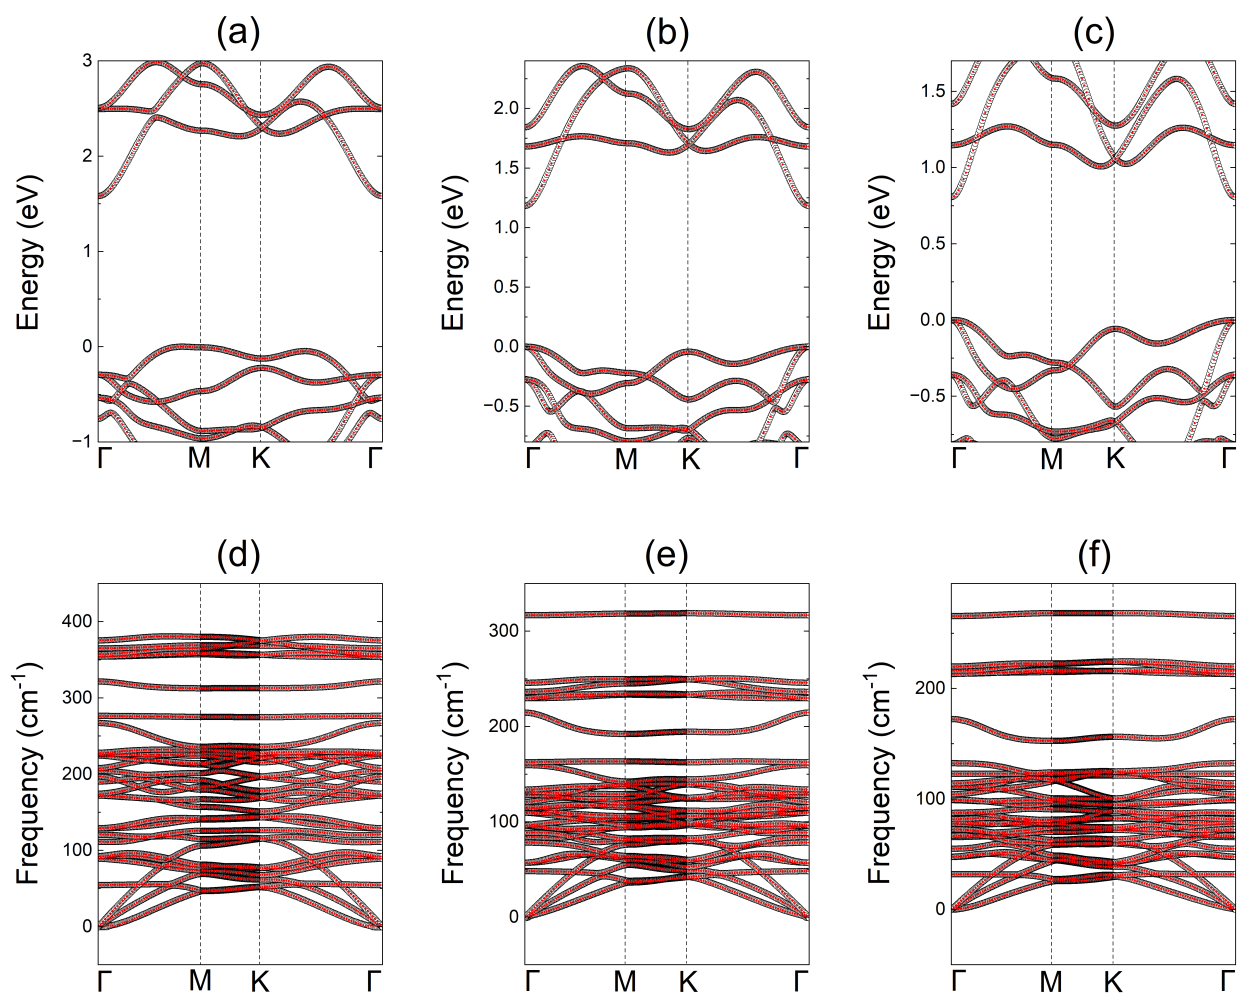

Figure S2. The electronic band structure of InGeX<sub>3</sub> (X=S, Se and Te) monolayer calculated from DFT (symbol in black) and Wannier interpolation approach (symbol in red)
